# Supplementary material for: Effectiveness of a Patient-Tailored, Pharmacist-Led Intervention Program to Enhance Adherence to Antihypertensive Medication: The CATI Study
Source: PubMed Central journal article supplement (PMC6169131; doi:10.3389/fphar.2018.01057), 2018-09-26
Supplement: Table_1.pdf [file Table_1.pdf]

**APPENDIX A – Results of the sensitivity analyses for the primary outcome**

**Table A1** Per protocol analyses including intervention participants who attended both the first and follow-up consultation (N=151)

|                         | <b>Overall effect</b>      |                | <b>T1</b>                  |                | <b>T2</b>                  |                | <b>T3</b>                  |                |
|-------------------------|----------------------------|----------------|----------------------------|----------------|----------------------------|----------------|----------------------------|----------------|
|                         | <i>Difference (95% CI)</i> | <i>p-value</i> | <i>Difference (95% CI)</i> | <i>p-value</i> | <i>Difference (95% CI)</i> | <i>p-value</i> | <i>Difference (95% CI)</i> | <i>p-value</i> |
| <b>MARS-5 sum score</b> |                            |                |                            |                |                            |                |                            |                |
| crude <sup>a</sup>      | 0.08 (-0.38 to 0.54)       | 0.747          | -0.18 (-0.73 to 0.37)      | 0.518          | 0.26 (-0.30 to 0.81)       | 0.365          | 0.20 (-0.40 to 0.76)       | 0.502          |
| adjusted <sup>b</sup>   | 0.09 (-0.37 to 0.54)       | 0.706          | -0.17 (-0.72 to 0.37)      | 0.537          | 0.27 (-0.28 to 0.82)       | 0.332          | 0.21 (-0.36 to 0.78)       | 0.473          |
|                         | <i>OR (95% CI)</i>         | <i>p-value</i> | <i>OR (95% CI)</i>         | <i>p-value</i> | <i>OR (95% CI)</i>         | <i>p-value</i> | <i>OR (95% CI)</i>         | <i>p-value</i> |
| <b>MARS-5 (&lt;25)</b>  |                            |                |                            |                |                            |                |                            |                |
| crude                   | 1.05 (0.96 to 1.15)        | 0.317          | 1.05 (0.93 to 1.18)        | 0.418          | 0.99 (0.88 to 1.12)        | 0.878          | 1.12 (0.99 to 1.27)        | 0.071          |
| adjusted                | 1.05 (0.95 to 1.15)        | 0.358          | 1.05 (0.93 to 1.18)        | 0.451          | 0.99 (0.88 to 1.11)        | 0.824          | 1.12 (0.99 to 1.27)        | 0.081          |

**Abbreviation** CI: confidence interval, MARS-5: Medication Adherence Report Scale

<sup>a</sup> Corrected for baseline value of the particular outcome

<sup>b</sup> Additionally corrected for possible confounders age, gender and education level

**Table A2** Subgroup analyses to stratify for gender

|                         | Overall effect                |                |                               |                | T1                            |                |                               |                | T2                            |                |                               |                | T3                            |                |                         |                |
|-------------------------|-------------------------------|----------------|-------------------------------|----------------|-------------------------------|----------------|-------------------------------|----------------|-------------------------------|----------------|-------------------------------|----------------|-------------------------------|----------------|-------------------------|----------------|
|                         | Male gender                   |                | Female gender                 |                | Male gender                   |                | Female gender                 |                | Male gender                   |                | Female gender                 |                | Male gender                   |                | Female gender           |                |
|                         | <i>Difference</i><br>(95% CI) | <i>p-value</i> | <i>Difference</i><br>(95% CI) | <i>p-value</i> | <i>Difference</i><br>(95% CI) | <i>p-value</i> | <i>Difference</i><br>(95% CI) | <i>p-value</i> | <i>Difference</i><br>(95% CI) | <i>p-value</i> | <i>Difference</i><br>(95% CI) | <i>p-value</i> | <i>Difference</i><br>(95% CI) | <i>p-value</i> |                         |                |
| <b>MARS-5 sum score</b> |                               |                |                               |                |                               |                |                               |                |                               |                |                               |                |                               |                |                         |                |
| crude <sup>a</sup>      | 0.29<br>(-0.28 to 0.86)       | 0.316          | 0.19<br>(-0.50 to 0.87)       | 0.596          | 0.16<br>(-0.54 to 0.87)       | 0.651          | -0.12<br>(-0.90 to 0.66)      | 0.764          | 0.55<br>(-0.17 to 1.26)       | 0.132          | 0.28<br>(-0.52 to 1.07)       | 0.498          | 0.16<br>(-0.58 to 0.89)       | 0.678          | 0.54<br>(-0.29 to 1.36) | 0.202          |
| adjusted <sup>b</sup>   | 0.23<br>(-0.33 to 0.79)       | 0.417          | 0.24<br>(-0.46 to 0.94)       | 0.498          | 0.10<br>(-0.60 to 0.80)       | 0.780          | -0.06<br>(-0.85 to 0.73)      | 0.874          | 0.49<br>(-0.22 to 1.19)       | 0.175          | 0.34<br>(-0.47 to 1.14)       | 0.412          | 0.10<br>(-0.63 to 0.83)       | 0.790          | 0.59<br>(-0.24 to 1.42) | 0.164          |
|                         | <i>OR</i><br>(95% CI)         | <i>p-value</i> | <i>OR</i><br>(95% CI)         | <i>p-value</i> | <i>OR</i><br>(95% CI)         | <i>p-value</i> | <i>OR</i><br>(95% CI)         | <i>p-value</i> | <i>OR</i><br>(95% CI)         | <i>p-value</i> | <i>OR</i><br>(95% CI)         | <i>p-value</i> | <i>OR</i><br>(95% CI)         | <i>p-value</i> | <i>OR</i><br>(95% CI)   | <i>p-value</i> |
| <b>MARS-5 (&lt;25)</b>  |                               |                |                               |                |                               |                |                               |                |                               |                |                               |                |                               |                |                         |                |
| crude                   | 1.00<br>(0.87 to 1.14)        | 0.953          | 1.07<br>(0.95 to 1.22)        | 0.276          | 1.06<br>(0.91 to 1.23)        | 0.473          | 1.02<br>(0.86 to 1.20)        | 0.842          | 0.92<br>(0.78 to 1.09)        | 0.352          | 1.05<br>(0.91 to 1.22)        | 0.507          | 1.01<br>(0.84 to 1.21)        | 0.900          | 1.18<br>(0.99 to 1.40)  | 0.066          |
| adjusted                | 1.00<br>(0.88 to 1.14)        | 0.955          | 1.06<br>(0.94 to 1.20)        | 0.349          | 1.07<br>(0.92 to 1.24)        | 0.413          | 1.01<br>(0.85 to 1.19)        | 0.940          | 0.93<br>(0.79 to 1.10)        | 0.392          | 1.04<br>(0.90 to 1.20)        | 0.601          | 1.02<br>(0.85 to 1.22)        | 0.831          | 1.17<br>(0.98 to 1.38)  | 0.084          |

**Abbreviation** CI: confidence interval, MARS-5: Medication Adherence Report Scale

<sup>a</sup> Corrected for baseline value of the particular outcome

<sup>b</sup> Additionally corrected for possible confounders age, gender and education level

**Table A3** Subgroup analyses to stratify for age

|                         | Overall effect                |                |                               |                | T1                            |                |                               |                | T2                            |                |                               |                | T3                            |                |                         |       |
|-------------------------|-------------------------------|----------------|-------------------------------|----------------|-------------------------------|----------------|-------------------------------|----------------|-------------------------------|----------------|-------------------------------|----------------|-------------------------------|----------------|-------------------------|-------|
|                         | Younger (45-55)               |                | Older (56-75)                 |                | Younger (45-55)               |                | Older (56-75)                 |                | Younger (45-55)               |                | Older (56-75)                 |                | Younger (45-55)               |                | Older (56-75)           |       |
|                         | <i>Difference</i><br>(95% CI) | <i>p-value</i> | <i>Difference</i><br>(95% CI) | <i>p-value</i> | <i>Difference</i><br>(95% CI) | <i>p-value</i> | <i>Difference</i><br>(95% CI) | <i>p-value</i> | <i>Difference</i><br>(95% CI) | <i>p-value</i> | <i>Difference</i><br>(95% CI) | <i>p-value</i> | <i>Difference</i><br>(95% CI) | <i>p-value</i> |                         |       |
| <b>MARS-5 sum score</b> |                               |                |                               |                |                               |                |                               |                |                               |                |                               |                |                               |                |                         |       |
| crude <sup>a</sup>      | 0.24<br>(-0.84 to 1.32)       | 0.657          | 0.22<br>(-0.22 to 0.66)       | 0.324          | -0.27<br>(-1.47 to 0.92)      | 0.653          | 0.09<br>(-0.46 to 0.64)       | 0.751          | 0.98<br>(-0.22 to 2.18)       | 0.110          | 0.24<br>(-0.32 to 0.79)       | 0.409          | 0.07<br>(-1.15 to 1.29)       | 0.910          | 0.41<br>(-0.18 to 1.00) | 0.173 |
| adjusted <sup>b</sup>   | 0.30<br>(-0.74 to 1.34)       | 0.570          | 0.21<br>(-0.21 to 0.64)       | 0.332          | -0.27<br>(-1.45 to 0.91)      | 0.658          | 0.07<br>(-0.46 to 0.61)       | 0.787          | 0.98<br>(-0.21 to 2.17)       | 0.107          | 0.21<br>(-0.33 to 0.76)       | 0.445          | 0.07<br>(-1.14 to 1.29)       | 0.906          | 0.38<br>(-0.20 to 0.96) | 0.195 |
|                         | <i>OR</i><br>(95% CI)         | <i>p-value</i> | <i>OR</i><br>(95% CI)         | <i>p-value</i> | <i>OR</i><br>(95% CI)         | <i>p-value</i> | <i>OR</i><br>(95% CI)         | <i>p-value</i> | <i>OR</i><br>(95% CI)         | <i>p-value</i> | <i>OR</i><br>(95% CI)         | <i>p-value</i> | <i>OR</i><br>(95% CI)         | <i>p-value</i> |                         |       |
| <b>MARS-5 (&lt;25)</b>  |                               |                |                               |                |                               |                |                               |                |                               |                |                               |                |                               |                |                         |       |
| crude                   | 1.00<br>(0.89 to 1.13)        | 0.977          | 1.03<br>(0.92 to 1.16)        | 0.573          | 1.00<br>(0.82 to 1.21)        | 0.965          | 1.04<br>(0.91 to 1.20)        | 0.529          | 0.94<br>(0.80 to 1.11)        | 0.487          | 0.99<br>(0.86 to 1.14)        | 0.904          | 1.07<br>(0.95 to 1.21)        | 0.294          | 1.06<br>(0.90 to 1.25)  | 0.473 |
| adjusted                | 1.00<br>(0.91 to 1.12)        | 0.891          | 1.04<br>(0.92 to 1.17)        | 0.533          | 1.02<br>(0.86 to 1.22)        | 0.798          | 1.05<br>(0.91 to 1.21)        | 0.490          | 0.97<br>(0.84 to 1.12)        | 0.653          | 1.00<br>(0.87 to 1.15)        | 0.976          | 1.10<br>(0.97 to 1.24)        | 0.141          | 1.07<br>(0.91 to 1.26)  | 0.428 |

**Abbreviation** CI: confidence interval, MARS-5: Medication Adherence Report Scale

<sup>a</sup> Corrected for baseline value of the particular outcome

<sup>b</sup> Additionally corrected for possible confounders age, gender and education level

**Table A4** Subgroup analyses to stratify for blood pressure

|                         | Overall effect                |                |                               |                | T1                            |                |                               |                | T2                            |                |                               |                | T3                            |                |                               |                |
|-------------------------|-------------------------------|----------------|-------------------------------|----------------|-------------------------------|----------------|-------------------------------|----------------|-------------------------------|----------------|-------------------------------|----------------|-------------------------------|----------------|-------------------------------|----------------|
|                         | Normal BP                     |                | High BP <sup>c</sup>          |                | Normal BP                     |                | High BP                       |                | Normal BP                     |                | High BP                       |                | Normal BP                     |                | High BP                       |                |
|                         | <i>Difference</i><br>(95% CI) | <i>p-value</i> | <i>Difference</i><br>(95% CI) | <i>p-value</i> | <i>Difference</i><br>(95% CI) | <i>p-value</i> | <i>Difference</i><br>(95% CI) | <i>p-value</i> | <i>Difference</i><br>(95% CI) | <i>p-value</i> | <i>Difference</i><br>(95% CI) | <i>p-value</i> | <i>Difference</i><br>(95% CI) | <i>p-value</i> | <i>Difference</i><br>(95% CI) | <i>p-value</i> |
| <b>MARS-5 sum score</b> |                               |                |                               |                |                               |                |                               |                |                               |                |                               |                |                               |                |                               |                |
| crude <sup>a</sup>      | -0.36<br>(-0.98 to 0.26)      | 0.250          | 0.27<br>(-0.27 to 0.81)       | 0.324          | -0.24<br>(-0.96 to 0.49)      | 0.522          | -0.11<br>(-0.80 to 0.58)      | 0.757          | -0.33<br>(-1.05 to 0.39)      | 0.370          | 0.62<br>(-0.08 to 1.32)       | 0.081          | -0.51<br>(-1.26 to 0.23)      | 0.178          | 0.35<br>(-0.39 to 1.08)       | 0.351          |
| adjusted <sup>b</sup>   | -0.32<br>(-0.94 to 0.32)      | 0.327          | 0.23<br>(-0.30 to 0.76)       | 0.397          | -0.19<br>(-0.92 to 0.54)      | 0.611          | -0.15<br>(-0.84 to 0.53)      | 0.658          | -0.28<br>(-1.01 to 0.45)      | 0.447          | 0.59<br>(-0.10 to 0.89)       | 0.092          | -0.46<br>(-1.22 to 0.30)      | 0.232          | 0.32<br>(-0.41 to 1.05)       | 0.394          |
|                         | <i>OR</i><br>(95% CI)         | <i>p-value</i> | <i>OR</i><br>(95% CI)         | <i>p-value</i> | <i>OR</i><br>(95% CI)         | <i>p-value</i> | <i>OR</i><br>(95% CI)         | <i>p-value</i> | <i>OR</i><br>(95% CI)         | <i>p-value</i> | <i>OR</i><br>(95% CI)         | <i>p-value</i> | <i>OR</i><br>(95% CI)         | <i>p-value</i> | <i>OR</i><br>(95% CI)         | <i>p-value</i> |
| <b>MARS-5 (&lt;25)</b>  |                               |                |                               |                |                               |                |                               |                |                               |                |                               |                |                               |                |                               |                |
| crude                   | 1.15<br>(1.01 to 1.32)        | 0.039          | 0.99<br>(0.87 to 1.14)        | 0.939          | 1.05<br>(0.88 to 1.25)        | 0.612          | 1.09<br>(0.91 to 1.30)        | 0.359          | 1.12<br>(0.95 to 1.33)        | 0.188          | 0.93<br>(0.78 to 1.10)        | 0.392          | 1.33<br>(1.11 to 1.60)        | 0.003          | 0.97<br>(0.82 to 1.15)        | 0.722          |
| adjusted                | 1.14<br>(0.99 to 1.30)        | 0.069          | 1.01<br>(0.88 to 1.15)        | 0.881          | 1.03<br>(0.86 to 1.23)        | 0.742          | 1.11<br>(0.93 to 1.32)        | 0.262          | 1.10<br>(0.94 to 1.30)        | 0.233          | 0.94<br>(0.80 to 1.11)        | 0.475          | 1.30<br>(1.08 to 1.58)        | 0.006          | 0.99<br>(0.82 to 1.18)        | 0.871          |

**Abbreviation** CI: confidence interval, MARS-5: Medication Adherence Report Scale

<sup>a</sup> Corrected for baseline value of the particular outcome

<sup>b</sup> Additionally corrected for possible confounders age, gender and education level

<sup>c</sup> High blood pressure is defined as an elevated blood pressure exceeding 140 mm Hg in systolic phase and or 90 mm Hg in diastolic phase

**Table A5** Subgroup analyses including intervention participants with  $\geq 3$  barriers identified with the QBS during the first consultation (N=108)

|                         | Overall effect       |         | T1                   |         | T2                   |         | T3                  |         |
|-------------------------|----------------------|---------|----------------------|---------|----------------------|---------|---------------------|---------|
|                         | Difference (95% CI)  | p-value | Difference (95% CI)  | p-value | Difference (95% CI)  | p-value | Difference (95% CI) | p-value |
| <b>MARS-5 sum score</b> |                      |         |                      |         |                      |         |                     |         |
| crude <sup>a</sup>      | 0.56 (-0.08 to 1.19) | 0.087   | 0.19 (-0.57 to 0.96) | 0.624   | 0.74 (-0.03 to 1.52) | 0.060   | 0.84 (0.02 to 1.67) | 0.044*  |
| adjusted <sup>b</sup>   | 0.55 (-0.08 to 1.18) | 0.086   | 0.17 (-0.58 to 0.93) | 0.654   | 0.74 (-0.02 to 1.51) | 0.058   | 0.84 (0.03 to 1.65) | 0.042*  |
|                         | OR (95% CI)          | p-value | OR (95% CI)          | p-value | OR (95% CI)          | p-value | OR (95% CI)         | p-value |
| <b>MARS-5 (&lt;25)</b>  |                      |         |                      |         |                      |         |                     |         |
| crude                   | 1.09 (0.98 to 1.21)  | 0.133   | 1.13 (1.00 to 1.28)  | 0.038*  | 1.00 (0.86 to 1.19)  | 0.921   | 1.12 (0.94 to 1.33) | 0.198   |
| adjusted                | 1.09 (0.98 to 1.22)  | 0.130   | 1.14 (1.00 to 1.30)  | 0.048*  | 1.01 (0.85 to 1.19)  | 0.903   | 1.12 (0.95 to 1.33) | 0.180   |

**Abbreviation** CI: confidence interval, MARS-5: Medication Adherence Report Scale, QBS: Quick Barrier Scan

<sup>a</sup> Corrected for baseline value of the particular outcome

<sup>b</sup> Additionally corrected for possible confounders age, gender and education level

\* Statistically significant

**Table A6** Subgroup analyses including participants with a MARS-5 score of  $\leq 23$  at baseline (N=102)

|                                      | Overall effect       |         | T1                   |         | T2                   |         | T3                   |         |
|--------------------------------------|----------------------|---------|----------------------|---------|----------------------|---------|----------------------|---------|
|                                      | Difference (95% CI)  | p-value | Difference (95% CI)  | p-value | Difference (95% CI)  | p-value | Difference (95% CI)  | p-value |
| <b>MARS-5 sum score</b>              |                      |         |                      |         |                      |         |                      |         |
| crude <sup>a</sup>                   | 0.35 (-0.39 to 1.09) | 0.355   | 0.02 (-0.85 to 0.89) | 0.966   | 0.52 (-0.36 to 1.40) | 0.245   | 0.61 (-0.30 to 1.52) | 0.187   |
| adjusted <sup>b</sup>                | 0.43 (-0.30 to 1.15) | 0.252   | 0.09 (-0.76 to 0.95) | 0.829   | 0.59 (-0.27 to 1.46) | 0.179   | 0.68 (-0.21 to 1.58) | 0.135   |
|                                      | OR (95% CI)          | p-value | OR (95% CI)          | p-value | OR (95% CI)          | p-value | OR (95% CI)          | p-value |
| <b>MARS-5 (<math>\leq 23</math>)</b> |                      |         |                      |         |                      |         |                      |         |
| crude                                | 0.98 (0.85 to 1.14)  | 0.816   | 1.10 (0.91 to 1.32)  | 0.314   | 0.91 (0.75 to 1.11)  | 0.364   | 0.93 (0.77 to 1.13)  | 0.483   |
| adjusted                             | 0.99 (0.85 to 1.14)  | 0.835   | 1.10 (0.91 to 1.33)  | 0.316   | 0.92 (0.76 to 1.11)  | 0.376   | 0.93 (0.77 to 1.13)  | 0.484   |

**Abbreviation** CI: confidence interval, MARS-5: Medication Adherence Report Scale

<sup>a</sup> Corrected for baseline value of the particular outcome

<sup>b</sup> Additionally corrected for possible confounders age, gender and education level
